# Supplementary material for: Actinoquinazolinone, a New Quinazolinone Derivative from a Marine Bacterium Streptomyces sp. CNQ-617, Suppresses the Motility of Gastric Cancer Cells
Source: MDPI journal article supplement (doi:10.3390/md21090489), 2023-09-13
Supplement: s1 [file s1]

## Supplementary Material

# Actinoquinazolinone, a New Quinazolinone Derivative from a Marine Bacterium *Streptomyces* sp. CNQ-617, Suppresses the Motility of Gastric Cancer Cells

Sultan Pulat <sup>1,†</sup>, Da-Ae Kim <sup>2,†</sup>, Prima F. Hillman <sup>2,†</sup>, Dong-Chan Oh <sup>3</sup>, Hangun Kim <sup>1,\*</sup>, Sang-Jip Nam <sup>2,\*</sup>  
and William Fenical <sup>4,\*</sup>

<sup>1</sup> College of Pharmacy and Research Institute of Life and Pharmaceutical Sciences, Suncheon National University, Suncheon 57922, Republic of Korea; sultanpulat@s.scnu.ac.kr

<sup>2</sup> Department of Chemistry and Nanoscience, Ewha Womans University, Seoul 03760, Republic of Korea; 123rlaekdo@ewhain.net (D.-A.K.); primafitriah@gmail.com (P.F.H.)

<sup>3</sup> Natural Products Research Institute, College of Pharmacy, Seoul National University, Seoul 08826, Republic of Korea; dongchanoh@snu.ac.kr

<sup>4</sup> Center of Marine Biotechnology and Biomedicine, Scripps Institution of Oceanography, University of California San Diego, La Jolla, CA 92093-0204, USA

\* Correspondence: hangunkim@sunchon.ac.kr (H.K.); sjnam@ewha.ac.kr (S.-J.N.); wfenical@ucsd.edu (W.F.)

† These authors contributed equally to this work.

## Table of Contents

|                                                                                                                                                      |    |
|------------------------------------------------------------------------------------------------------------------------------------------------------|----|
| <b>Figure S1.</b> $^1\text{H}$ NMR Spectrum (400 MHz) of actinoquinazolinone ( <b>1</b> ) in $\text{DMSO}-d_6$ .....                                 | 3  |
| <b>Figure S2.</b> $^{13}\text{C}$ NMR Spectrum (100 MHz) of actinoquinazolinone ( <b>1</b> ) in $\text{DMSO}-d_6$ .....                              | 4  |
| <b>Figure S3.</b> COSY Spectrum (400 MHz) of actinoquinazolinone ( <b>1</b> ) in $\text{DMSO}-d_6$ .....                                             | 5  |
| <b>Figure S4.</b> HSQC Spectrum (400 MHz) of actinoquinazolinone ( <b>1</b> ) in $\text{DMSO}-d_6$ .....                                             | 6  |
| <b>Figure S5.</b> HMBC Spectrum (400 MHz) of actinoquinazolinone ( <b>1</b> ) in $\text{DMSO}-d_6$ .....                                             | 7  |
| <b>Figure S6.</b> $^1\text{H}$ NMR Spectrum (400 MHz) of 7-hydroxy-6-methoxy-3,4-dihydroquinazolin-4-one ( <b>2</b> ) in $\text{DMSO}-d_6$ .....     | 8  |
| <b>Figure S7.</b> $^{13}\text{C}$ NMR Spectrum (100 MHz) of 7-hydroxy-6-methoxy-3,4-dihydroquinazolin-4-one ( <b>2</b> ) in $\text{DMSO}-d_6$ .....  | 9  |
| <b>Figure S8.</b> $^1\text{H}$ NMR Spectrum (500 MHz) of 7-methoxy-8-hydroxy cycloanthranilylproline ( <b>3</b> ) in $\text{CD}_3\text{OD}$ .....    | 10 |
| <b>Figure S9.</b> $^{13}\text{C}$ NMR Spectrum (125 MHz) of 7-methoxy-8-hydroxy cycloanthranilylproline ( <b>3</b> ) in $\text{CD}_3\text{OD}$ ..... | 11 |
| <b>Figure S10.</b> IR Spectrum of actinoquinazolinone ( <b>1</b> ) .....                                                                             | 12 |
| <b>Figure S11.</b> HRMS Spectrum of actinoquinazolinone ( <b>1</b> ) .....                                                                           | 13 |

**Figure S1.**  $^1\text{H}$  NMR Spectrum (400 MHz) of actinoquinazolinone (**1**) in  $\text{DMSO-}d_6$

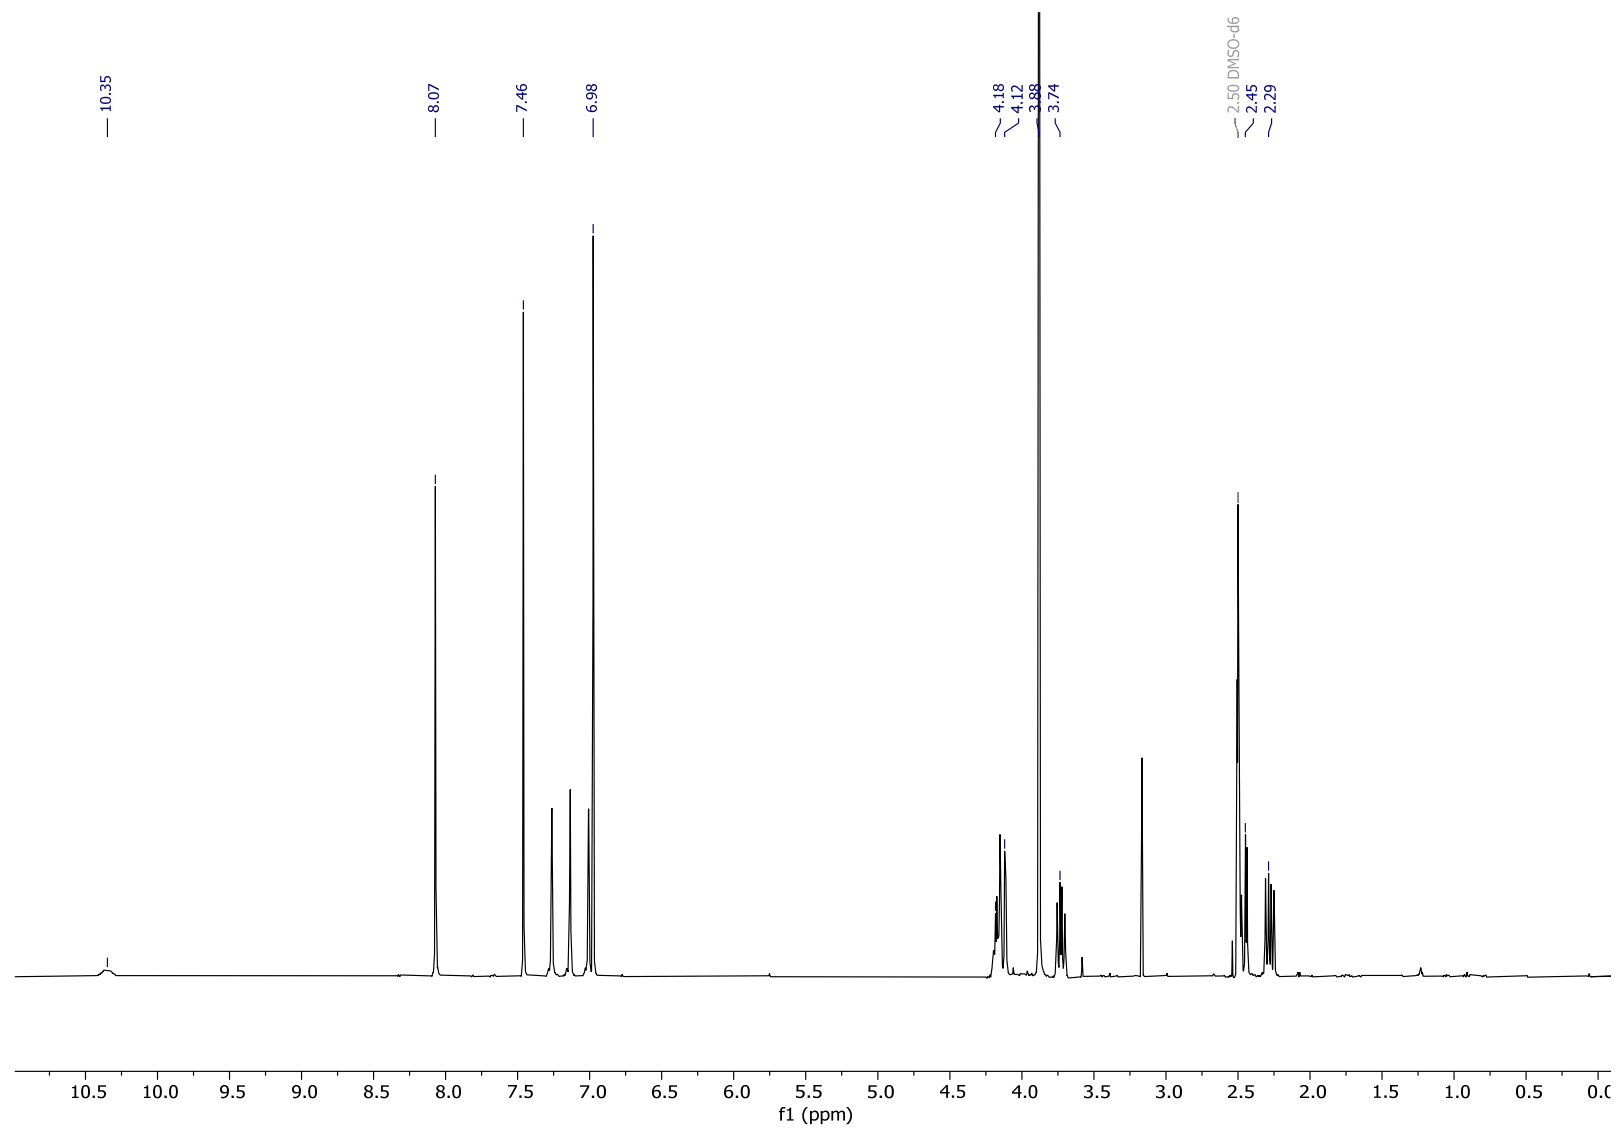

**Figure S2.**  $^{13}\text{C}$  NMR Spectrum (100 MHz) of actinoquinazolinone (**1**) in  $\text{DMSO-}d_6$

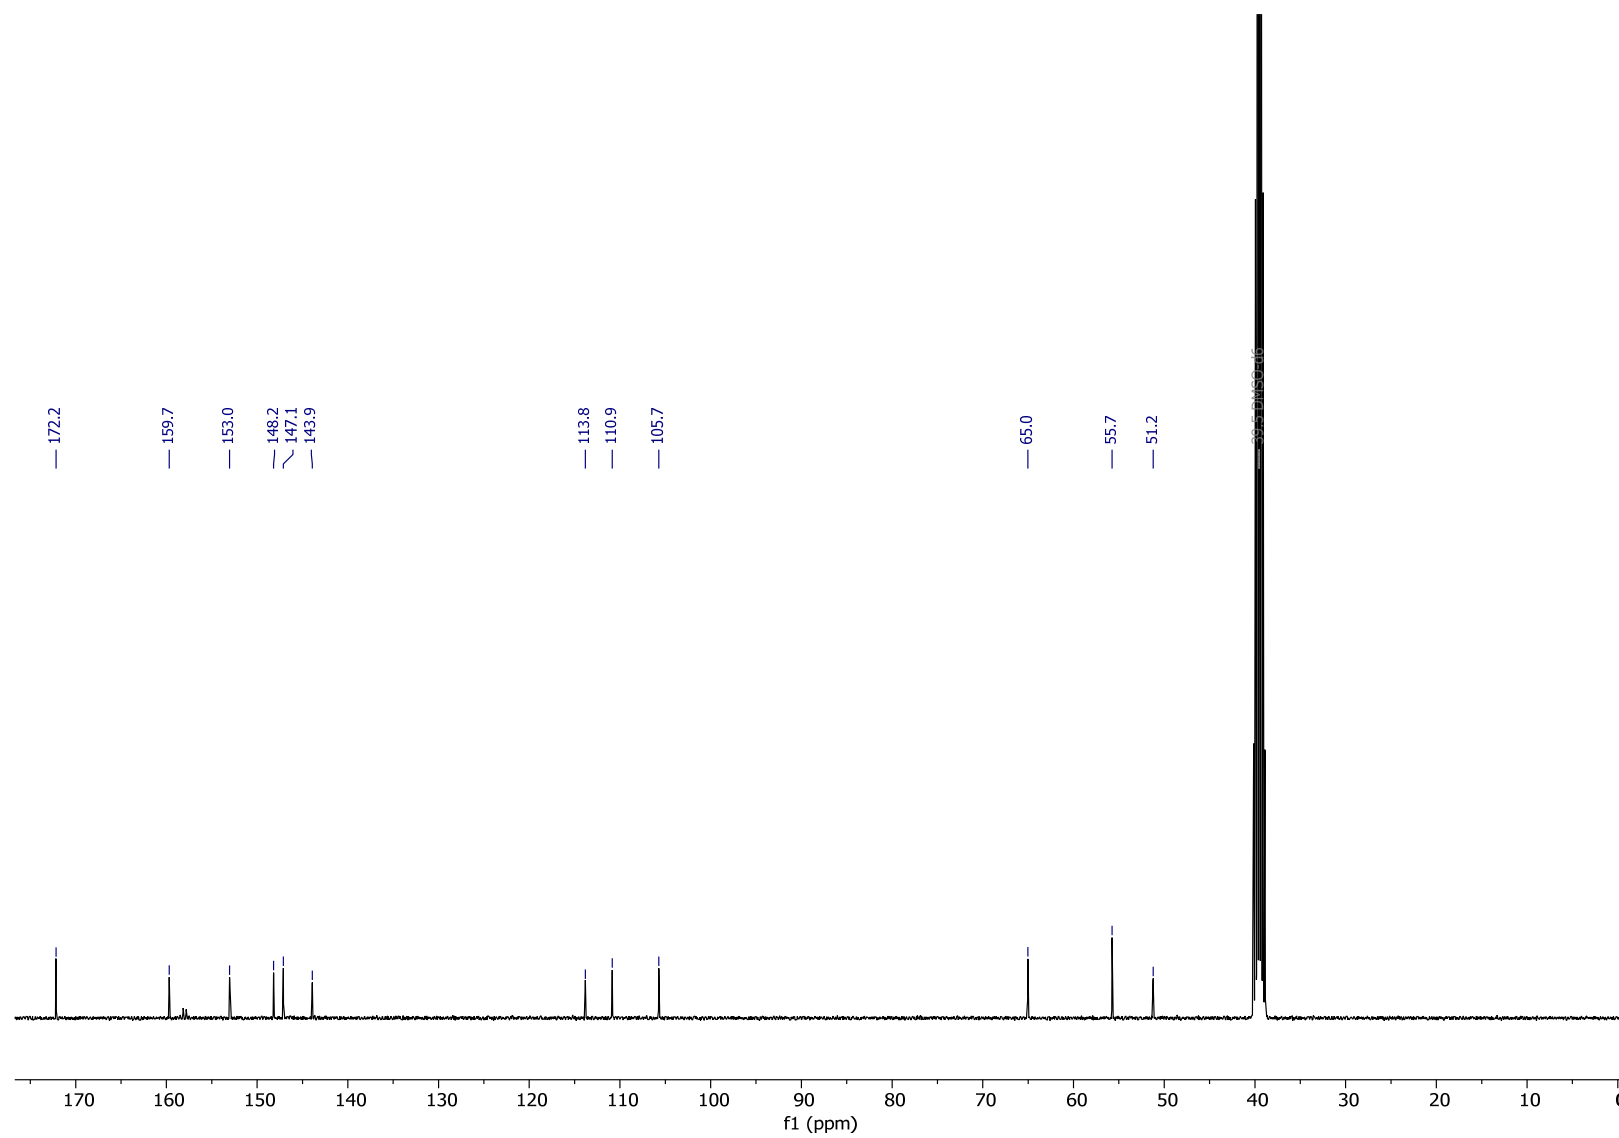

**Figure S3.** COSY Spectrum (400 MHz) of actinoquinazolinone (**1**) in DMSO-*d*<sub>6</sub>

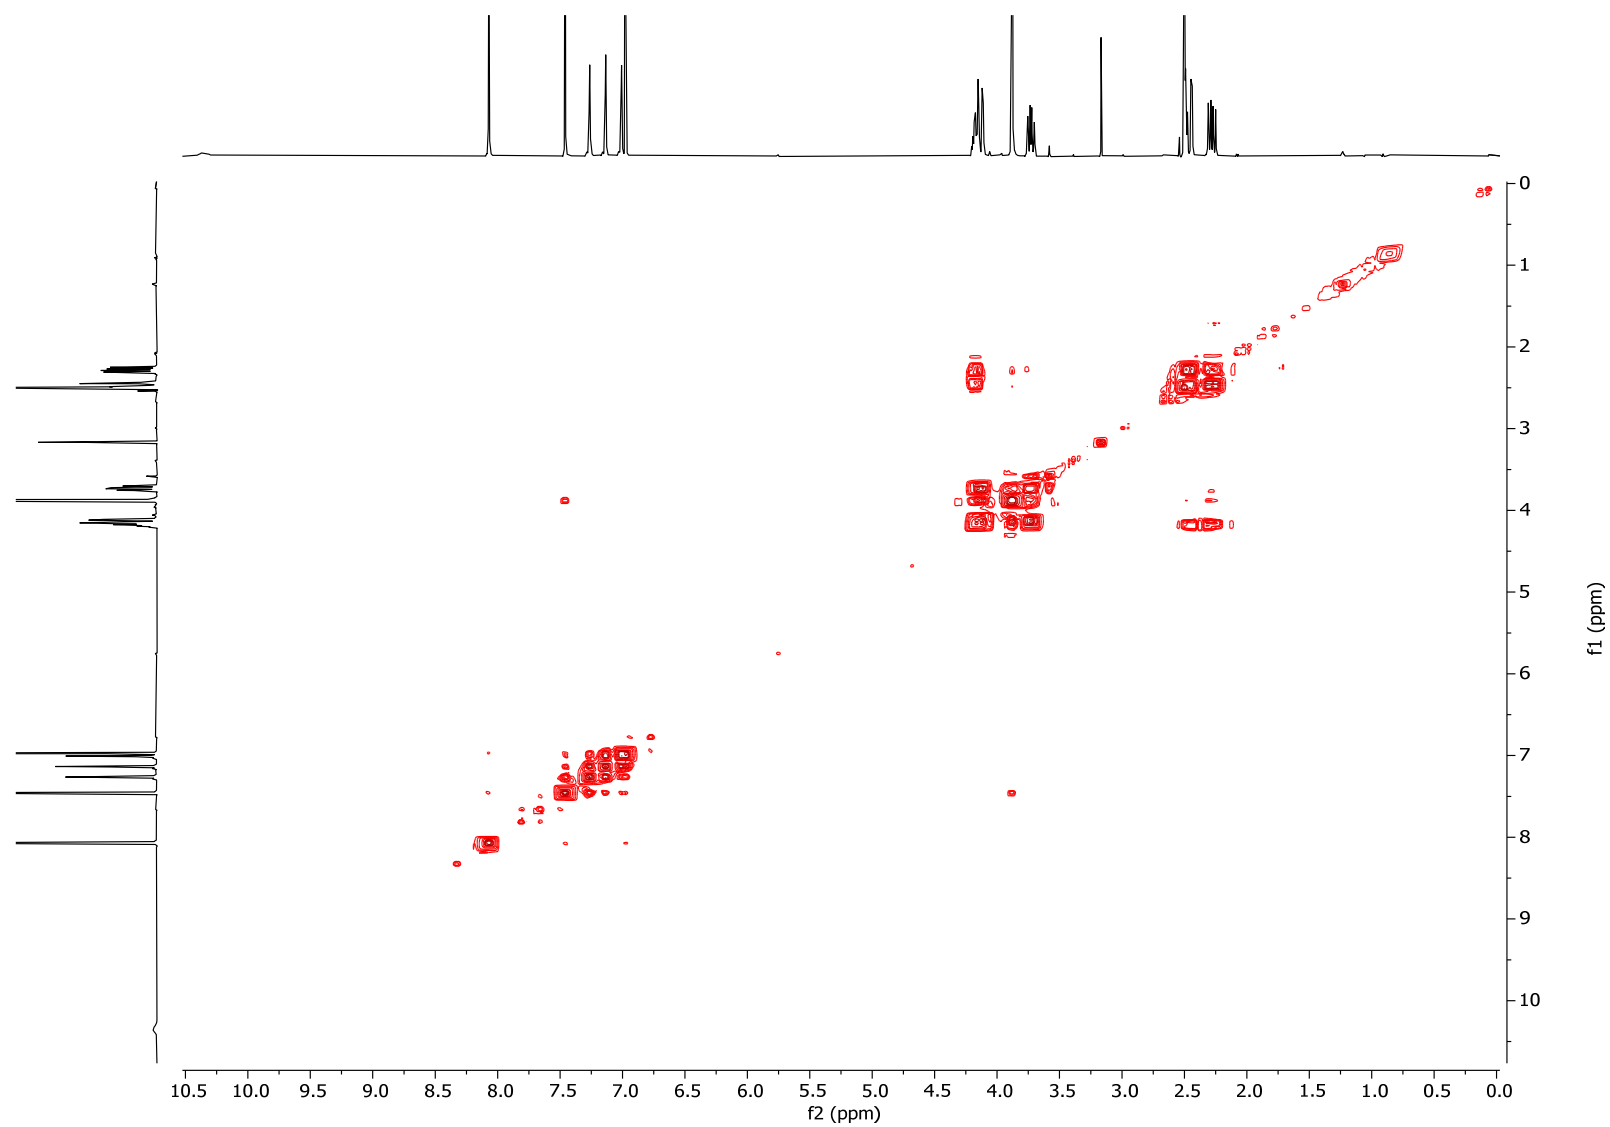

**Figure S4.** HSQC Spectrum (400 MHz) of actinoquinazolinone (**1**) in DMSO-*d*<sub>6</sub>

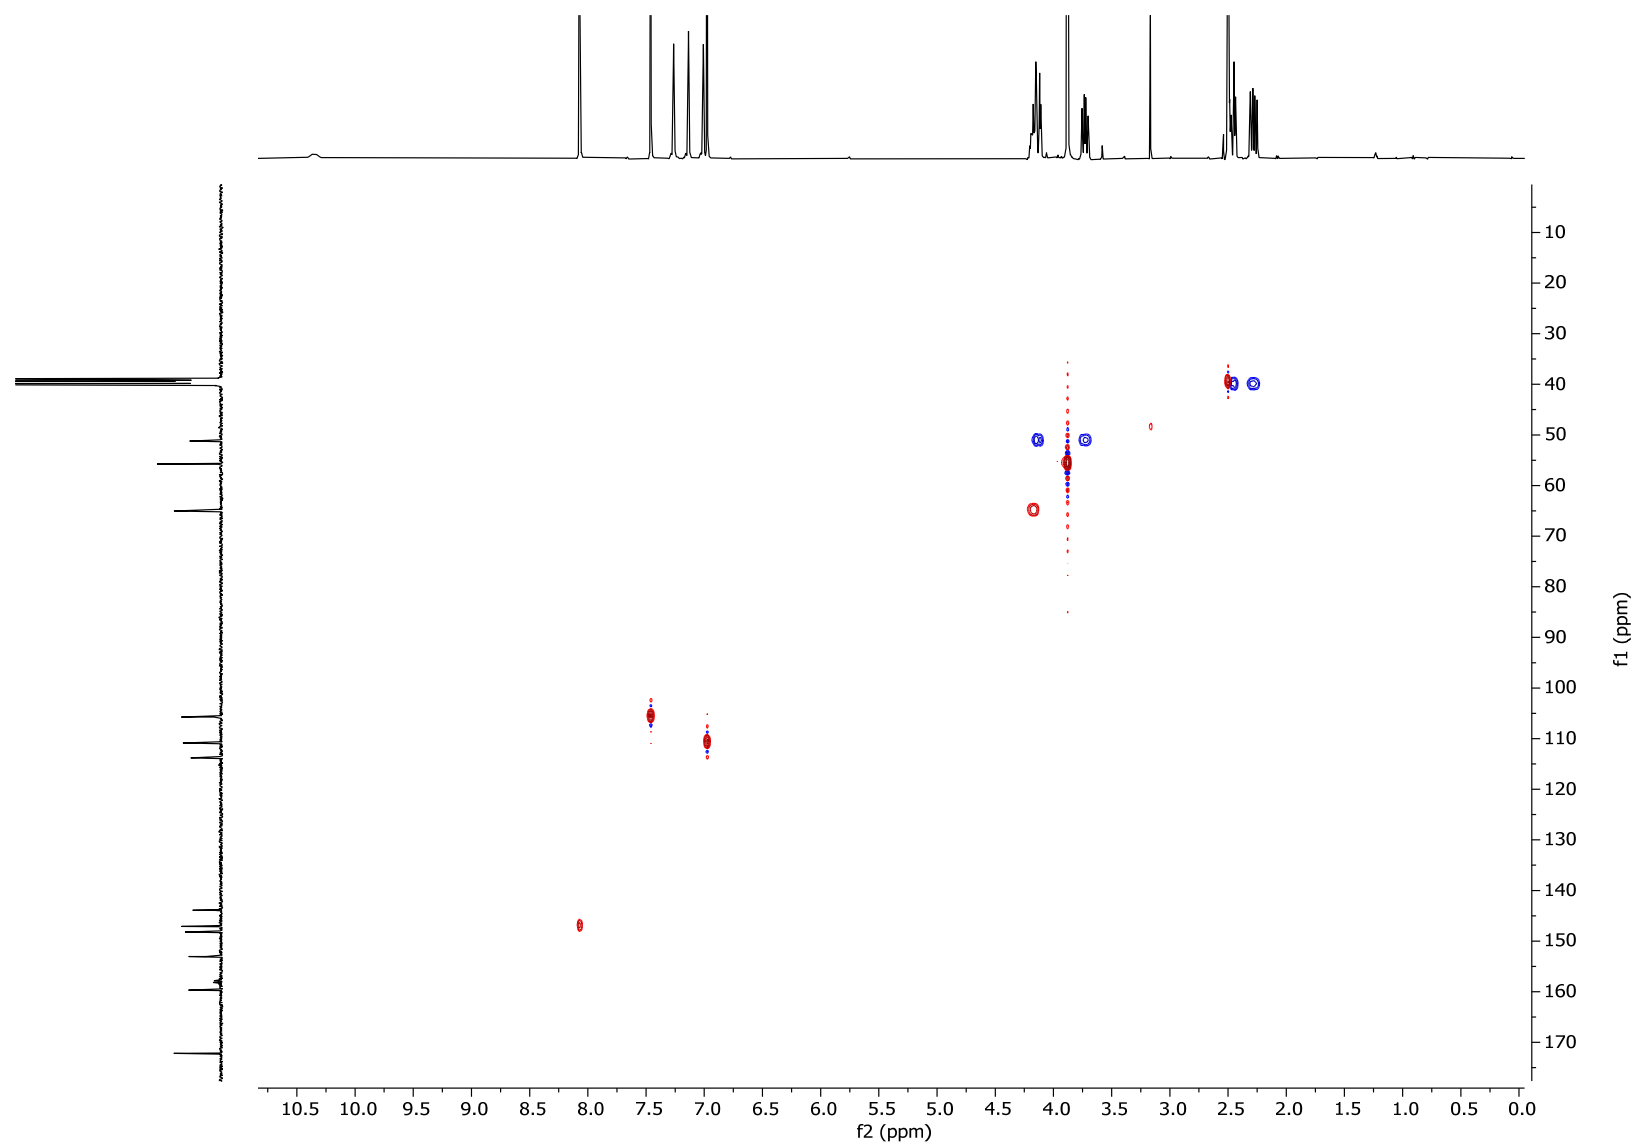

**Figure S5.** HMBC Spectrum (400 MHz) of actinoquinazolinone (**1**) in DMSO-*d*<sub>6</sub>

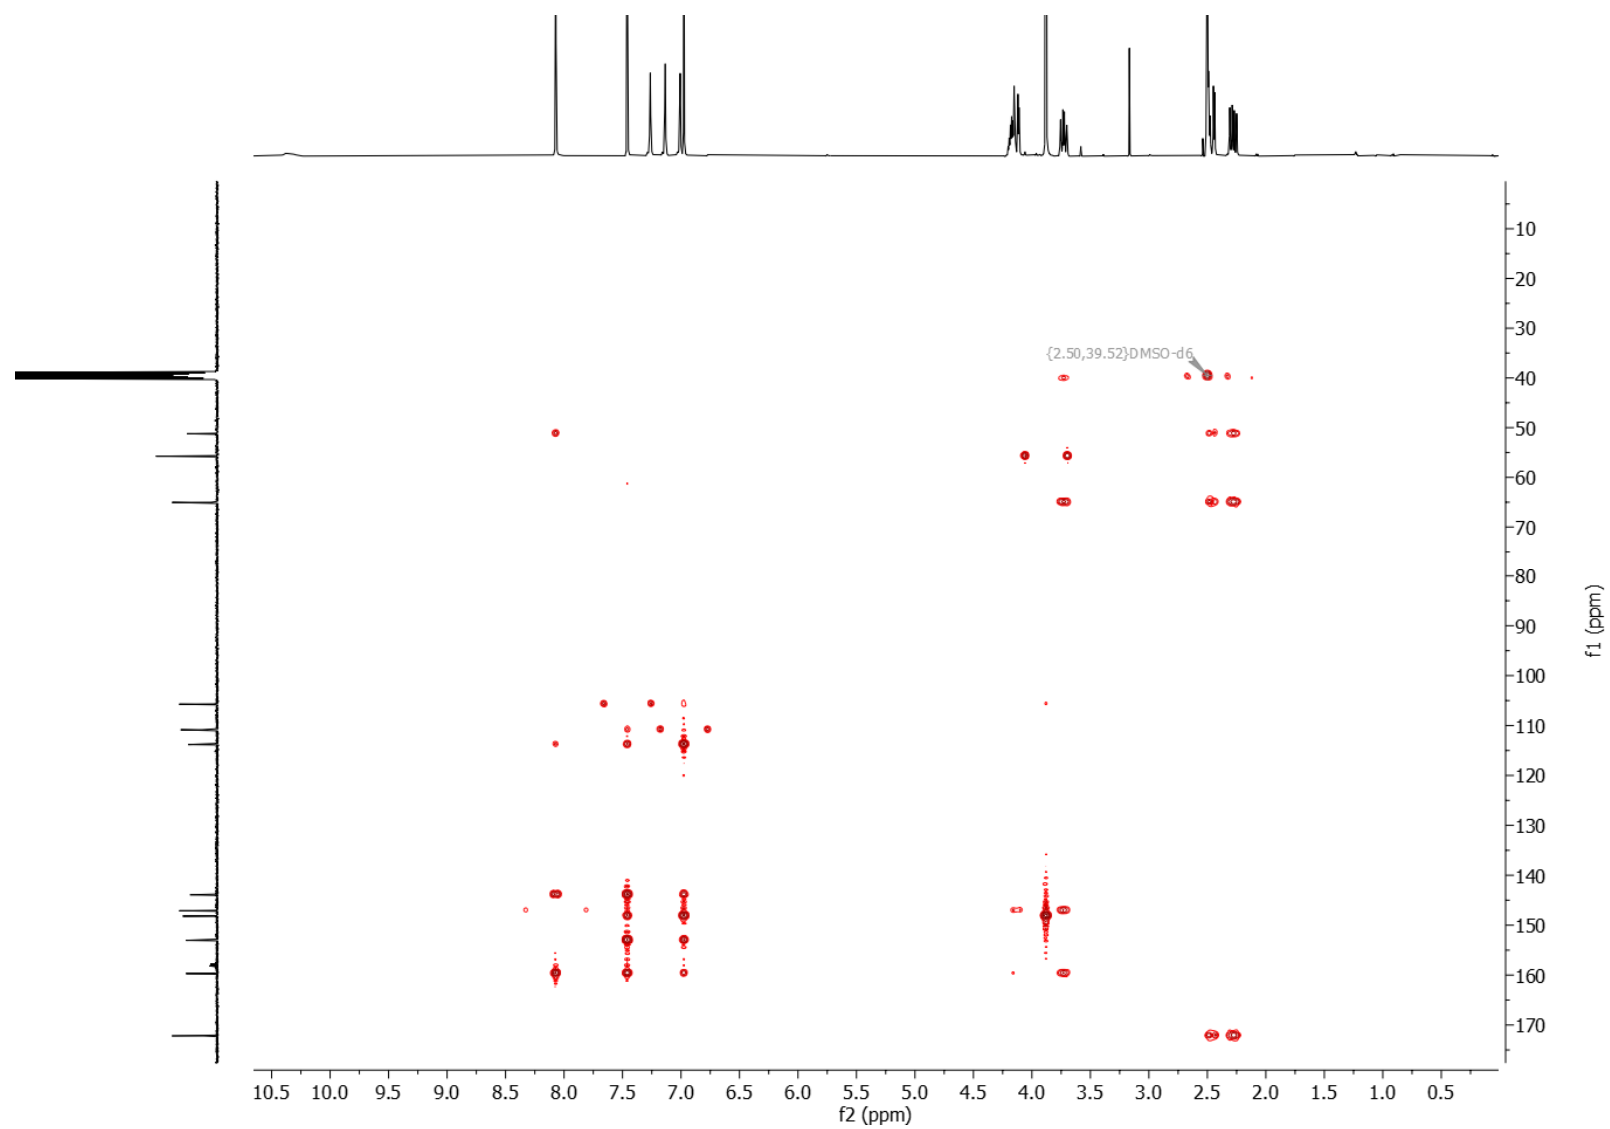

**Figure S6.**  $^1\text{H}$  NMR Spectrum (400 MHz) of 7-hydroxy-6-methoxy-3,4-dihydroquinazolin-4-one (**2**) in  $\text{DMSO-}d_6$

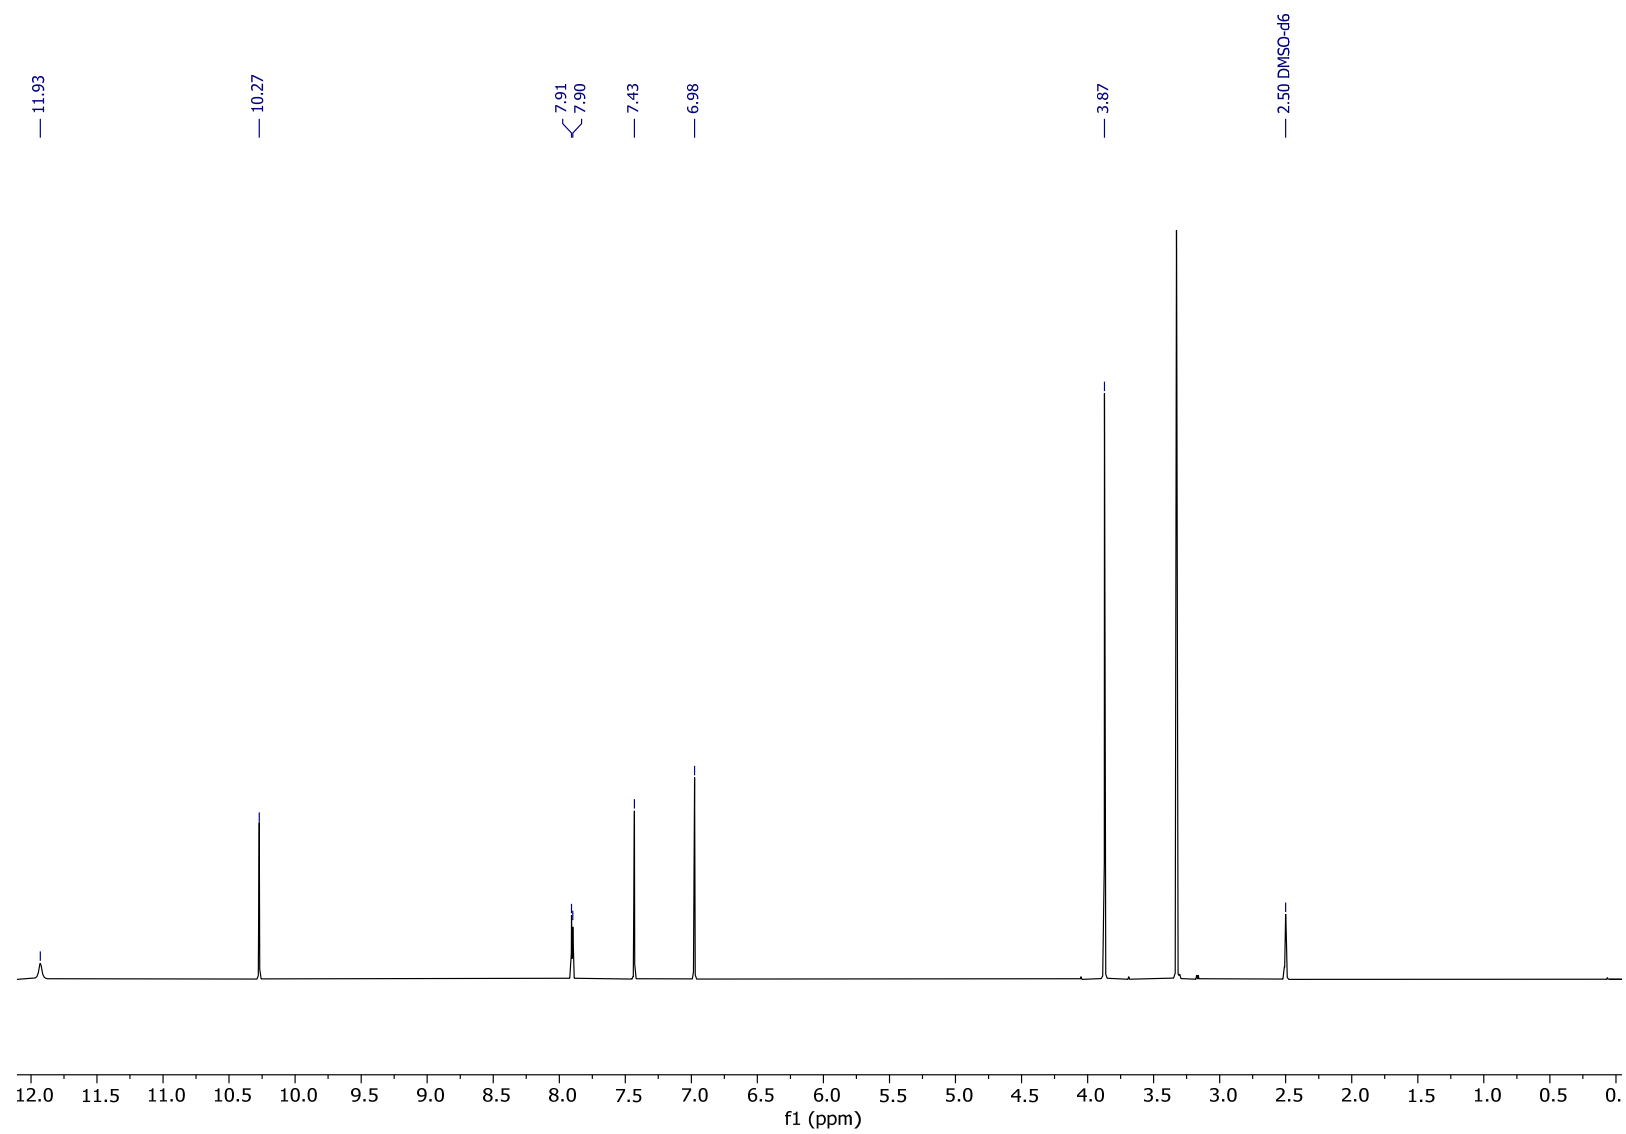



**Figure S7.**  $^{13}\text{C}$  NMR Spectrum (100 MHz) of 7-hydroxy-6-methoxy-3,4-dihydroquinazolin-4-one (**2**) in  $\text{DMSO-}d_6$

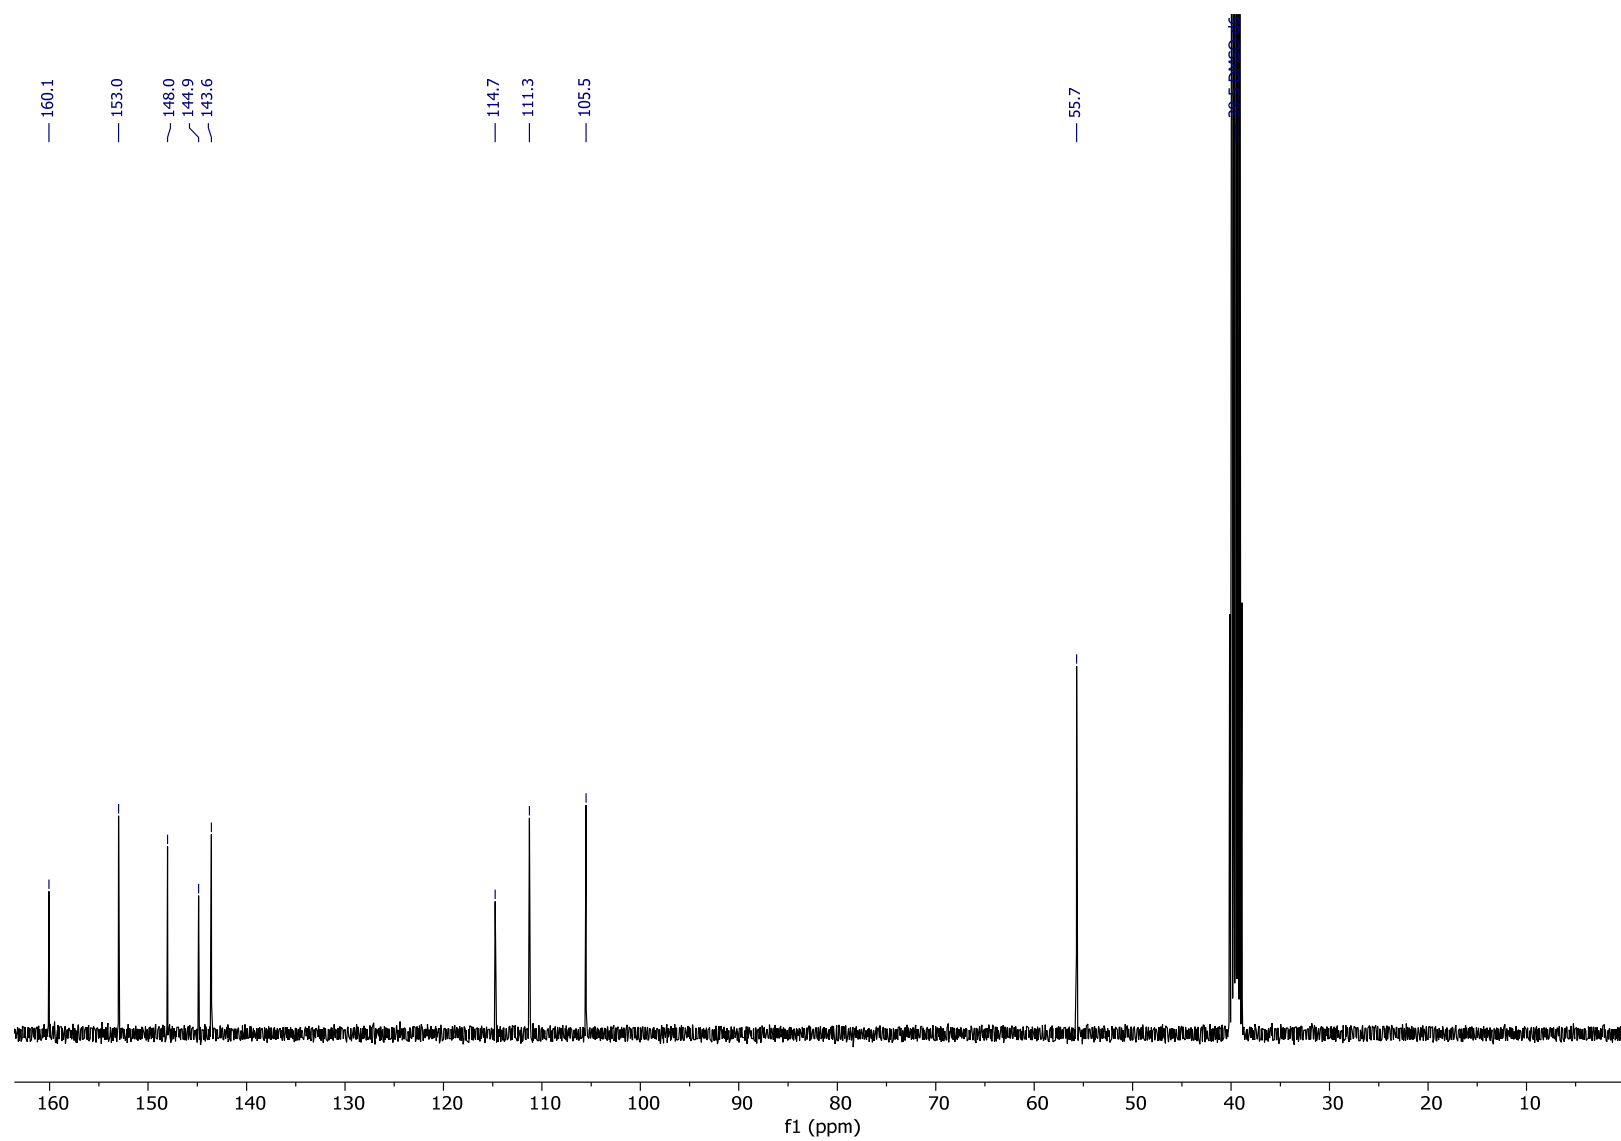

**Figure S8.**  $^1\text{H}$  NMR Spectrum (500 MHz) of 7-methoxy-8-hydroxy cycloanthranilylproline (**3**) in  $\text{CD}_3\text{OD}$

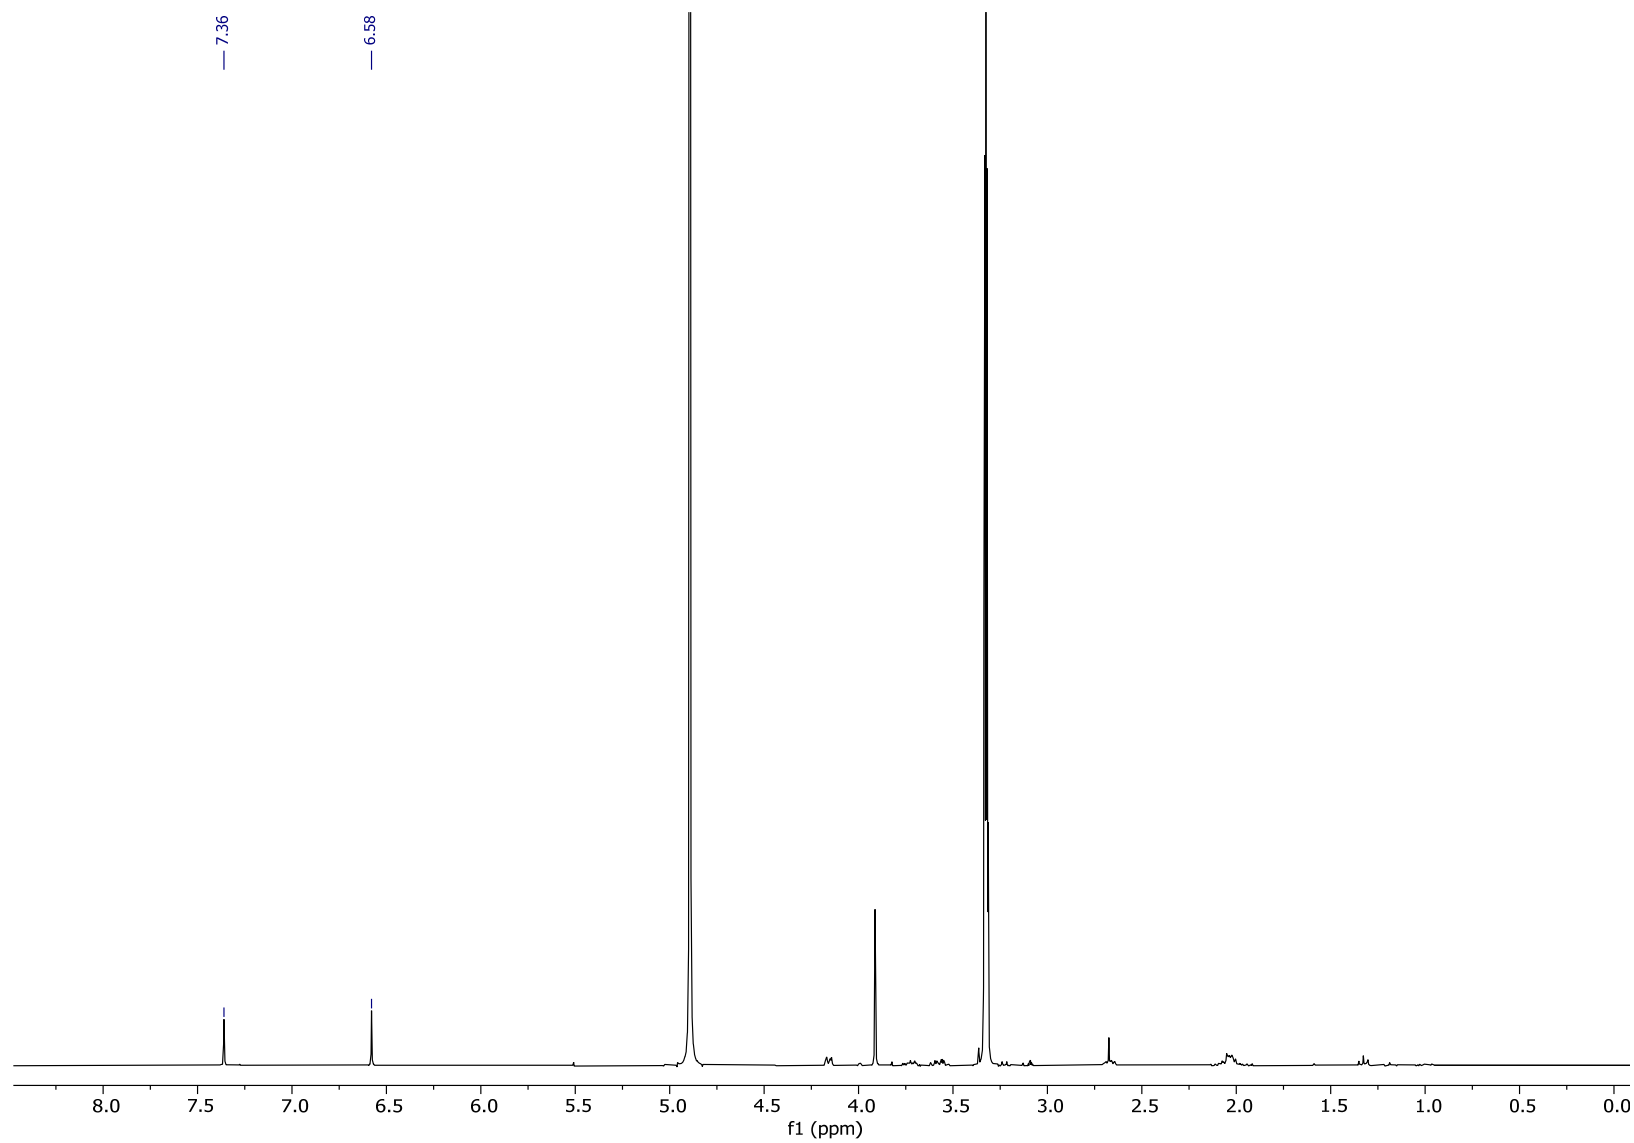

**Figure S9.**  $^{13}\text{C}$  NMR Spectrum (125 MHz) of 7-methoxy-8-hydroxy cycloanthranilylproline (**3**) in  $\text{CD}_3\text{OD}$

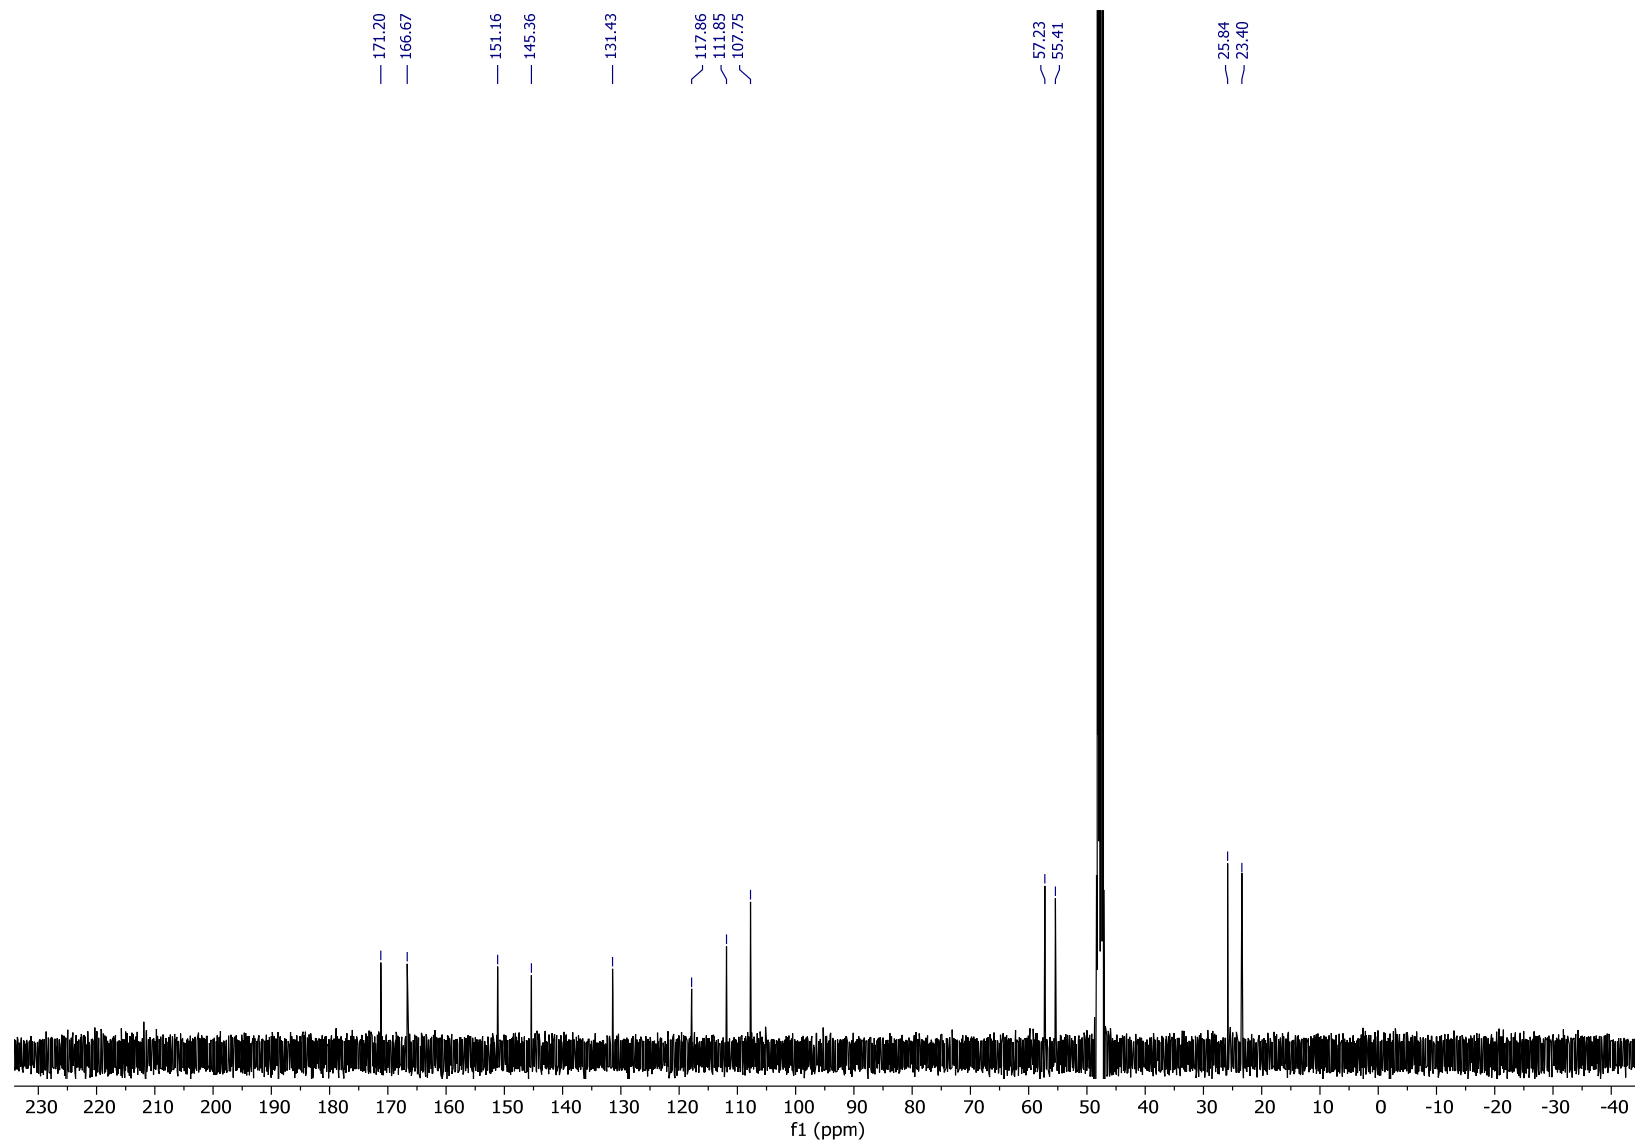

**Figure S10.** IR Spectrum of actinoquinazolinone (**1**)

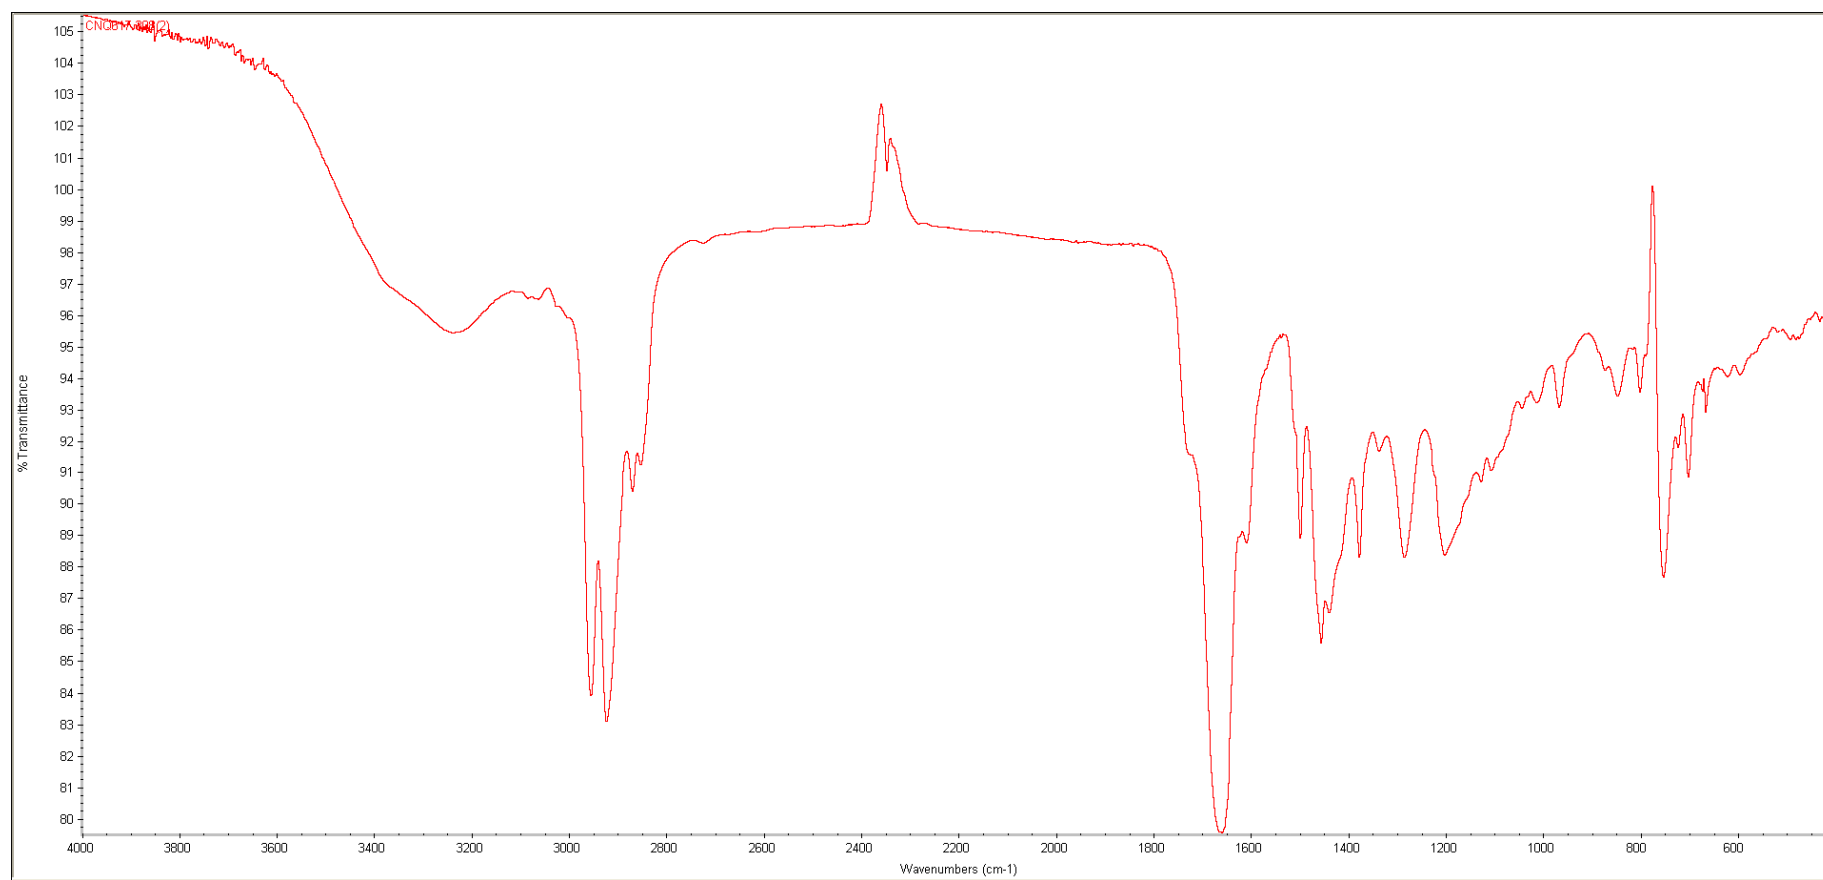

**Figure S11.** HRMS Spectrum of actinoquinazolinone (1)

[ Mass Spectrum ]

Data : FAB-D178 Date : 17-Feb-2022 13:45

RT : 0.05 min Scan# : (2,4)

Elements : C 100/0, H 100/0, N 5/0, O 10/0

Mass Tolerance : 10ppm, 5mmu if  $m/z < 500$ , 10mmu if  $m/z > 1000$

Unsaturation (U.S.) : -0.5 - 20.0

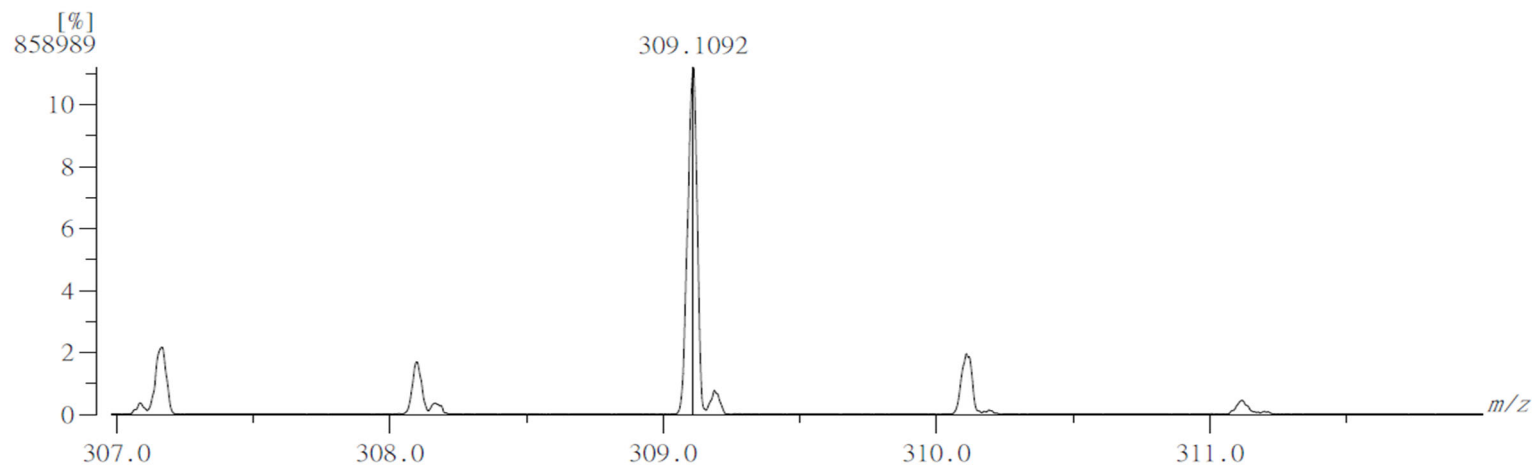

|   | Observed m/z | Int%  | Err [ppm / mmu] | U.S. | Composition   |
|---|--------------|-------|-----------------|------|---------------|
| 1 | 309.1092     | 11.21 | -15.6 / -4.8    | 16.5 | C20 H13 N4    |
| 2 |              |       | -6.9 / -2.1     | 12.0 | C17 H15 N3 O3 |
| 3 |              |       | -11.3 / -3.5    | 11.5 | C19 H17 O4    |
| 4 |              |       | +6.1 / +1.9     | 8.0  | C12 H15 N5 O5 |
| 5 |              |       | +1.7 / +0.5     | 7.5  | C14 H17 N2 O6 |
| 6 |              |       | +14.8 / +4.6    | 3.5  | C9 H17 N4 O8  |
| 7 |              |       | +10.4 / +3.2    | 3.0  | C11 H19 N O9  |
